# Supplementary material for: WSe2 nanoparticles with enhanced hydrogen evolution reaction prepared by bipolar electrochemistry: application in competitive magneto-immunoassay
Source: Royal Society of Chemistry journal article supplement (doi:10.1039/c8nr04670k), 2018-01-01
Supplement: c8nr04670k1.pdf [file c8nr04670k1.pdf]

## SUPPORTING INFORMATION

### **WSe<sub>2</sub> nanoparticles with enhanced hydrogen evolution reaction prepared by bipolar-electrochemistry: application in competitive magneto-immunoassay**

Vlastimil Mazánek,<sup>a</sup> Carmen C. Mayorga-Martinez,<sup>a</sup> Daniel Bouša,<sup>a</sup> Zdeněk Sofer,<sup>a</sup> Martin Pumera<sup>a\*</sup>

<sup>a</sup> Center for Advanced Functional Nanorobots, Department of Inorganic Chemistry, Faculty of Chemical Technology, University of Chemistry and Technology Prague, Technická 5, 166 28 Prague 6, Czech Republic

\*E-mail: pumera.research@gmail.com

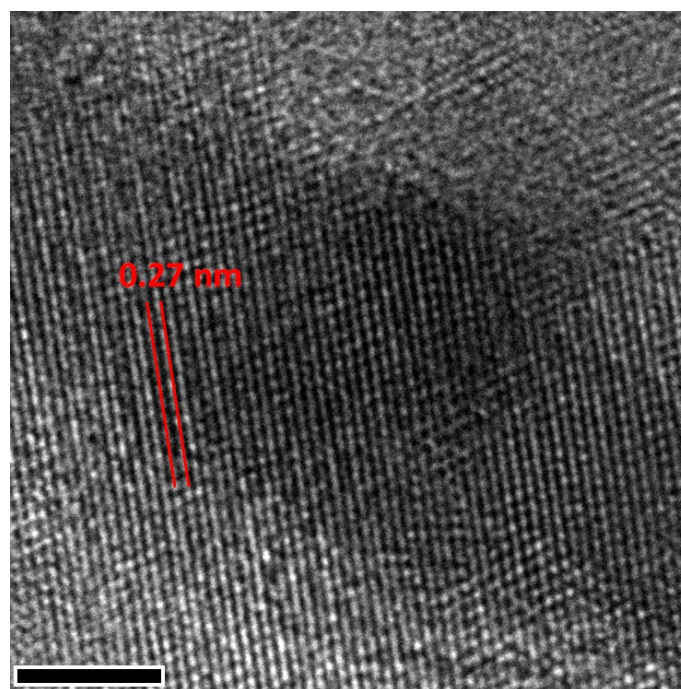

**Figure S1.** Detail from HR-TEM image with atomic fringes and corresponding spacing (0.27 nm). The scale bar is 3 nm.

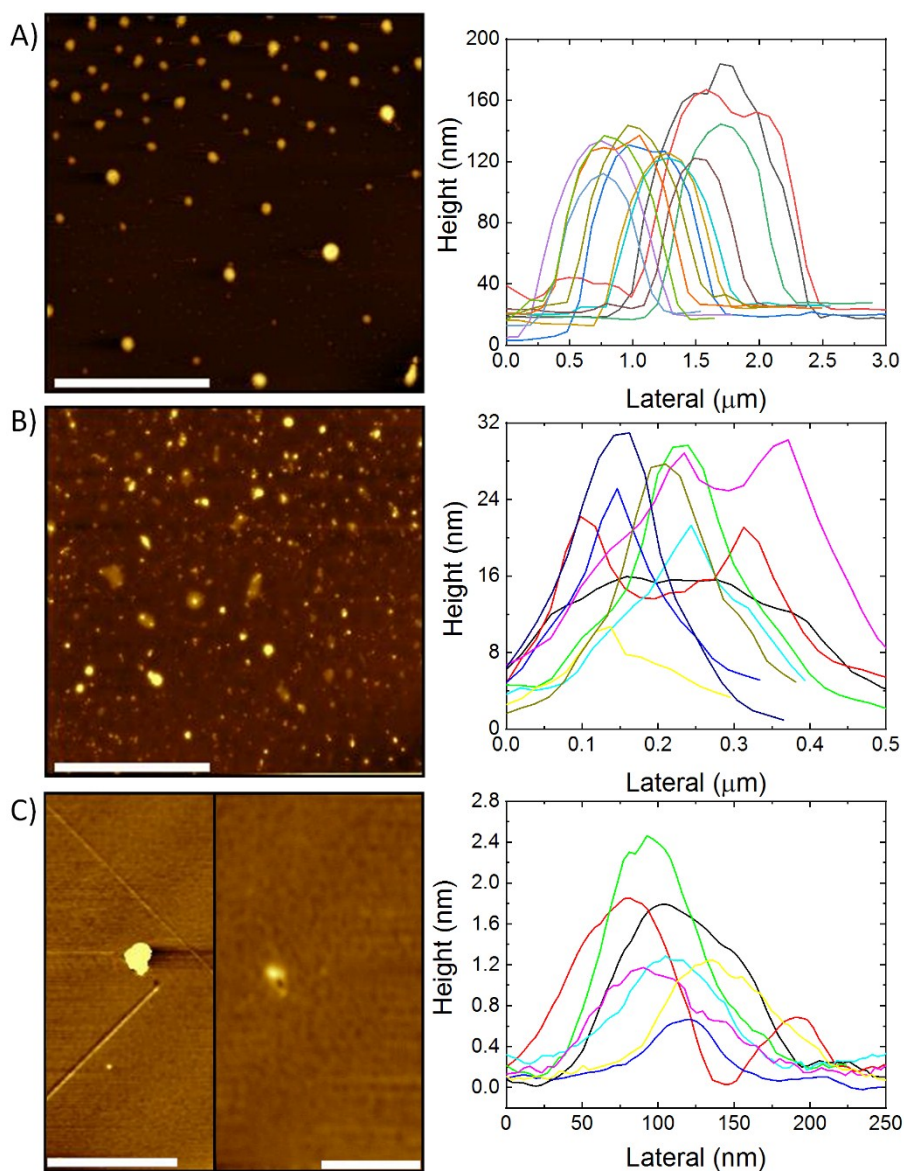

**Figure S2.** Pictures obtained by AFM and corresponding height profiles of A)  $\text{WSe}_2$  t-buli, B)  $\text{WSe}_2$  BE and C)  $\text{WSe}_2$  NPs with scale bars 10, 10  $\mu\text{m}$  and 500 nm, respectively. C) A five-layer nanoparticle is shown in left-handed image, while single-layer particle is in the right-handed image. Moreover, shown profiles were taken from more nanoparticles.

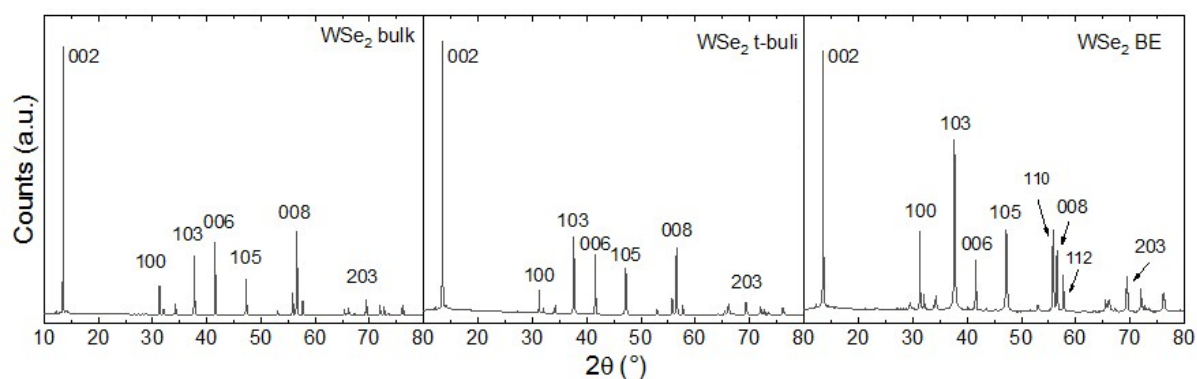

**Figure S3.** XRD patterns of  $\text{WSe}_2$  samples in which the most intense reflections were labelled.

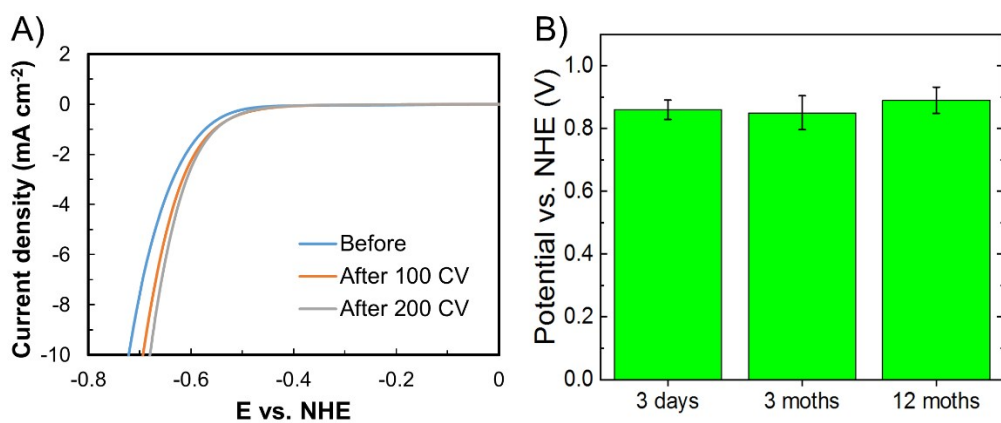

**Figure S4.** Electrochemical stability tests: A) HER polarisation curves of WSe<sub>2</sub> before and after 100 and 200 cyclic voltammetry cycles in sulfuric acid (0.5 M), and B) HER onsetpotentials at -10 mAcm<sup>-2</sup>from

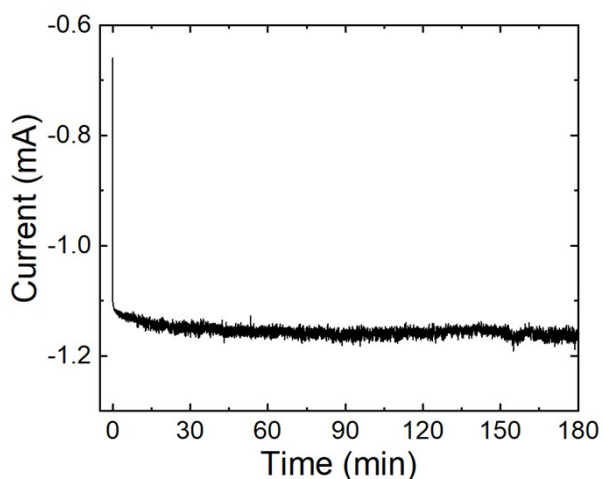

WSe<sub>2</sub> NPs after 3 days, 3 months and 12 months. The error bars are based on three measurements.

**Figure S5.** Electrochemical stability of WSe<sub>2</sub> NPs conducted by chronoamperometry using -1.2 V.

**Figure S6.** HR-XPS spectra obtained after the chronoamperometric test of stability. Bar chart is a comparison of the content of WSe<sub>2</sub> and WO<sub>3</sub> in WSe<sub>2</sub> NPS before and after the test of stability. The error bars are based on two measurements.

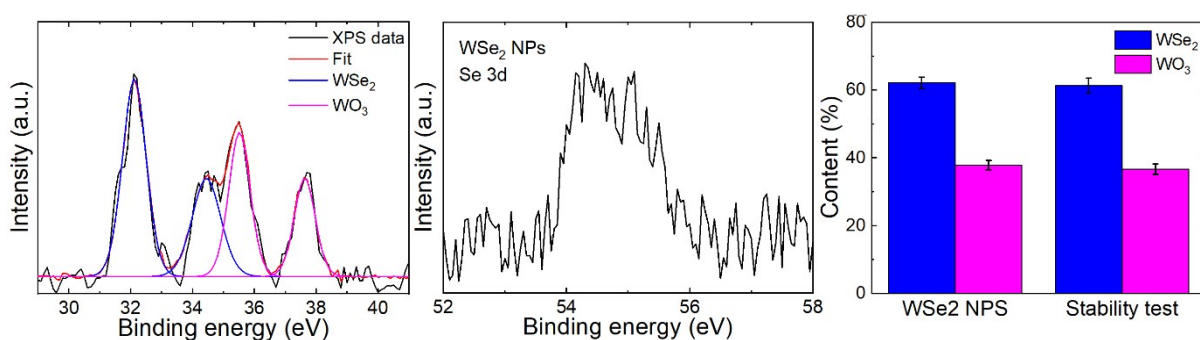



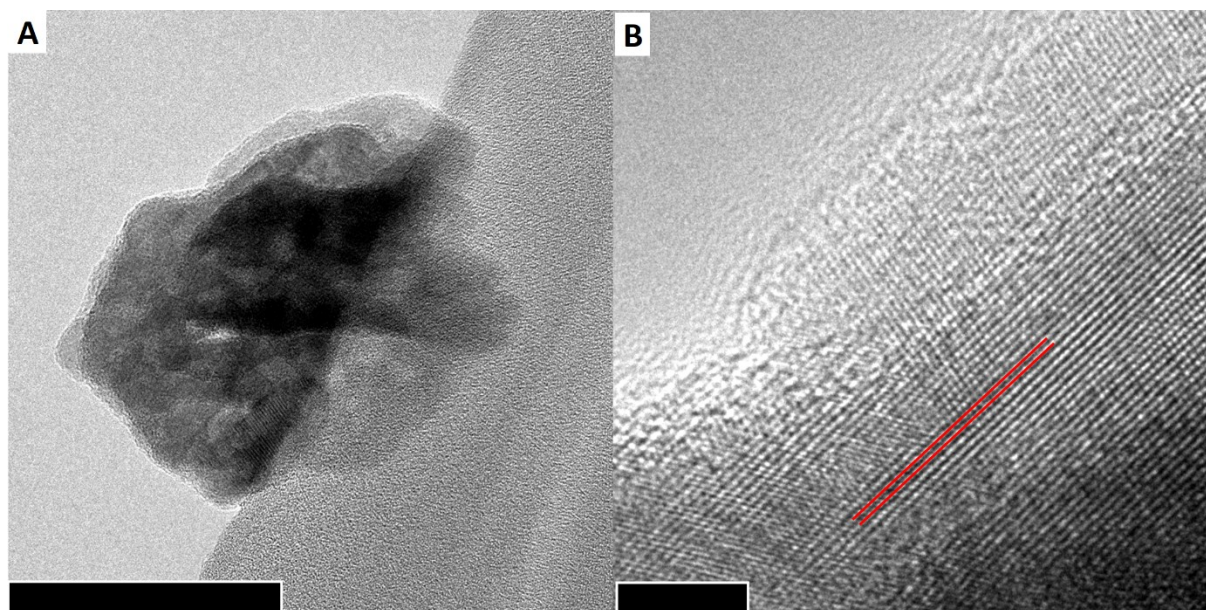

**Figure S7.** A) The TEM image of  $\text{WSe}_2$  NPs after the chronoamperometric test of stability. B) Detail from HR-TEM image with atomic fringes with corresponding spacing (0.27 nm). The scale bar is A) 70 nm

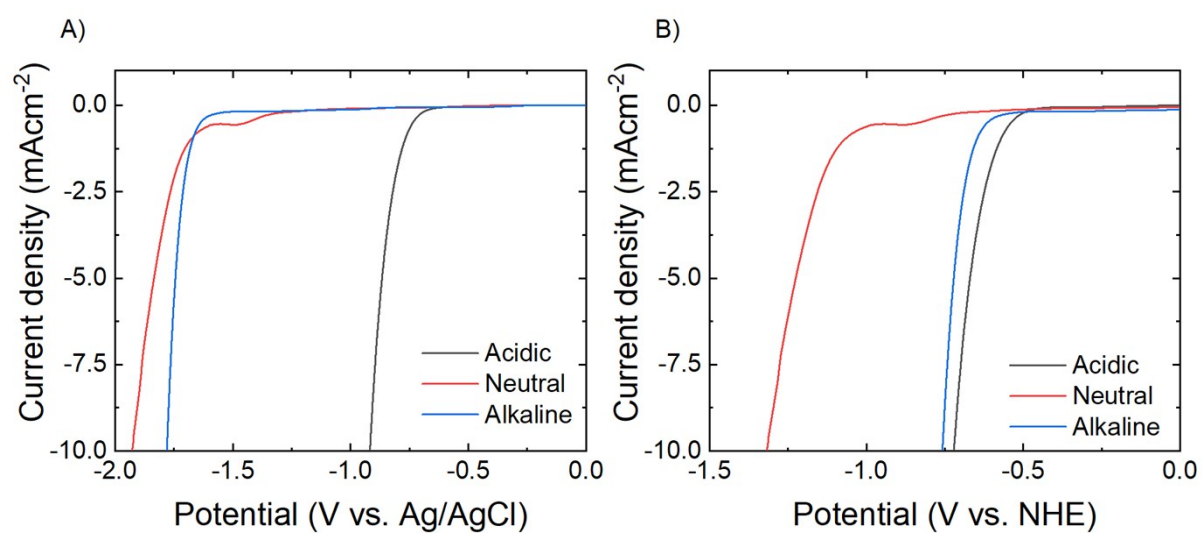

and B) 5 nm.

**Figure S8.** A) As measured LSV of HER conducted in acidic, neutral and alkaline electrolytes. B) The potential was recalculated vs normal hydrogen electrode.

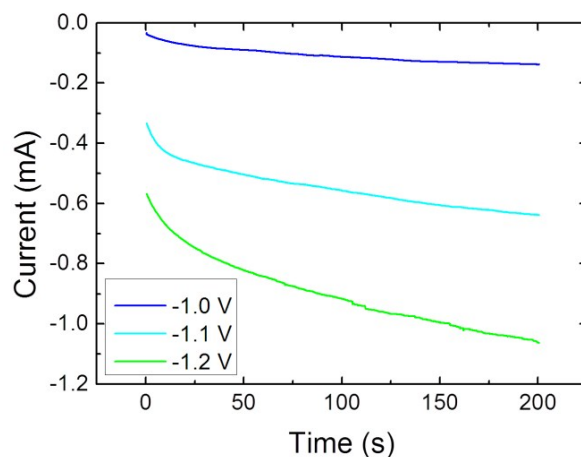

**Figure S9.** Chronoamperograms of WSe<sub>2</sub> NPs on SP electrode measured with three different applied potentials.

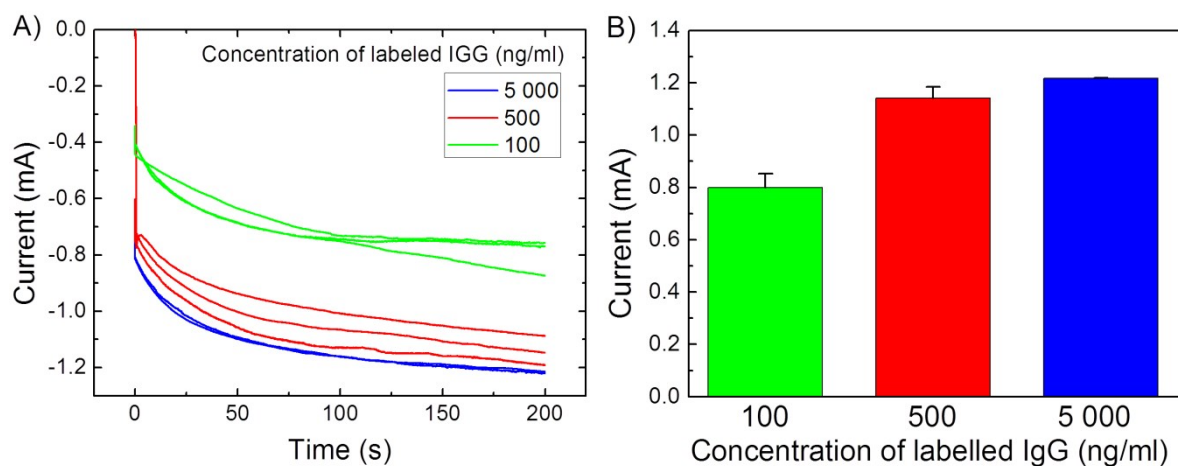

**Figure S10.** A) Chronoamperometry responses of protein detection in competitive magneto immunoassay configuration under different concentration of rabbit IgG labelled with WSe<sub>2</sub> NPs (legend) with 500 ng/ml of label-free IgG. B) Current response after 200 s with error bars based on three measurements.
